# Supplementary material
Source: PubMed Central journal article supplement (PMC2375463)

### A Control

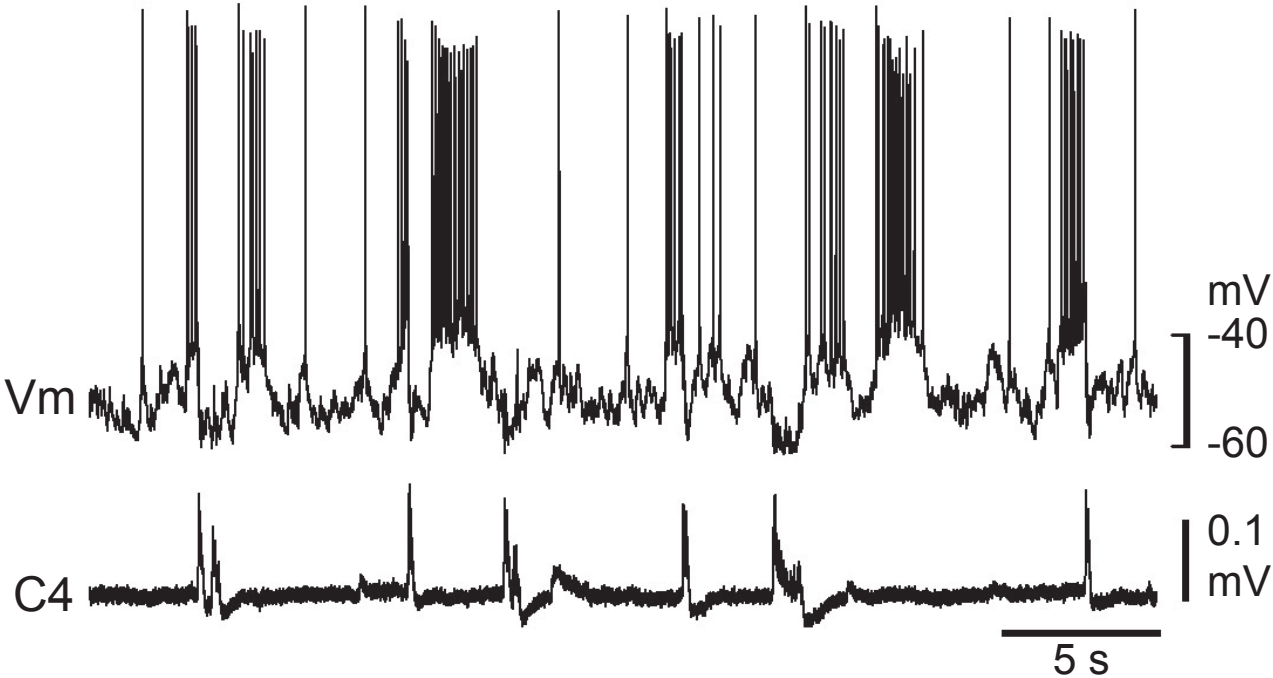

### B 0.2 $\mu$ M adrenaline

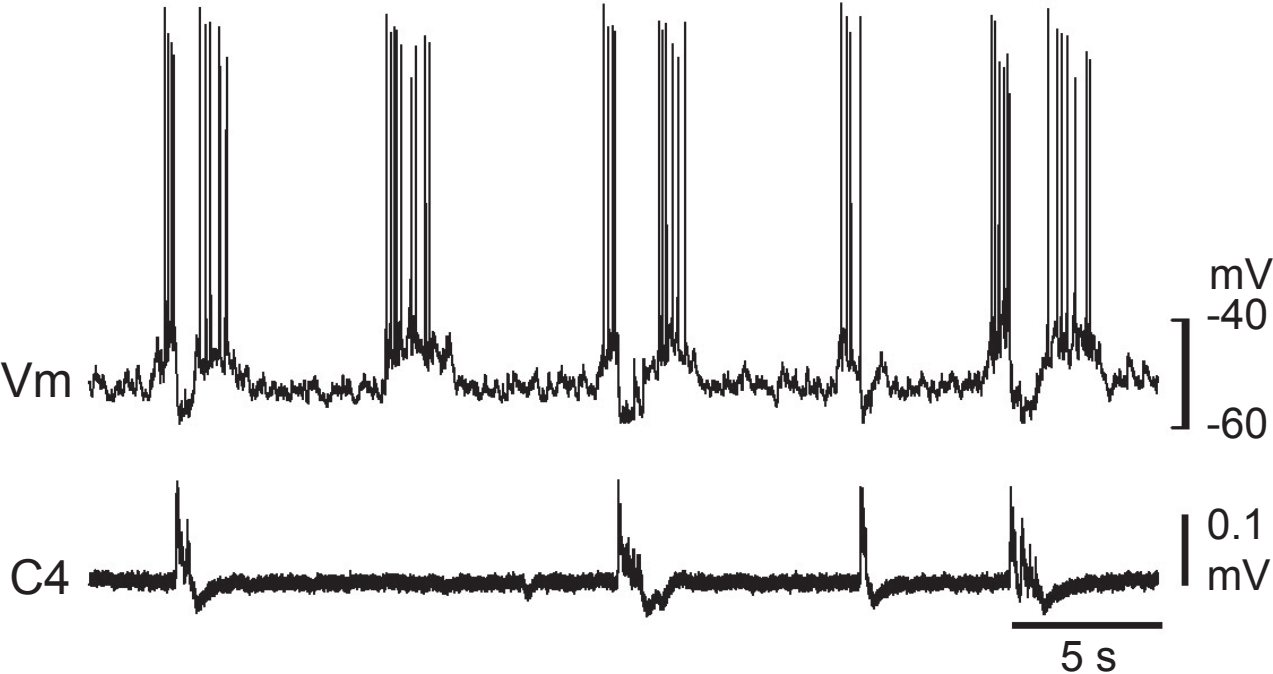

Supplement: tjp0585-0117_SD1.pdf [file tjp0585-0117_SD1.pdf]

# A Control

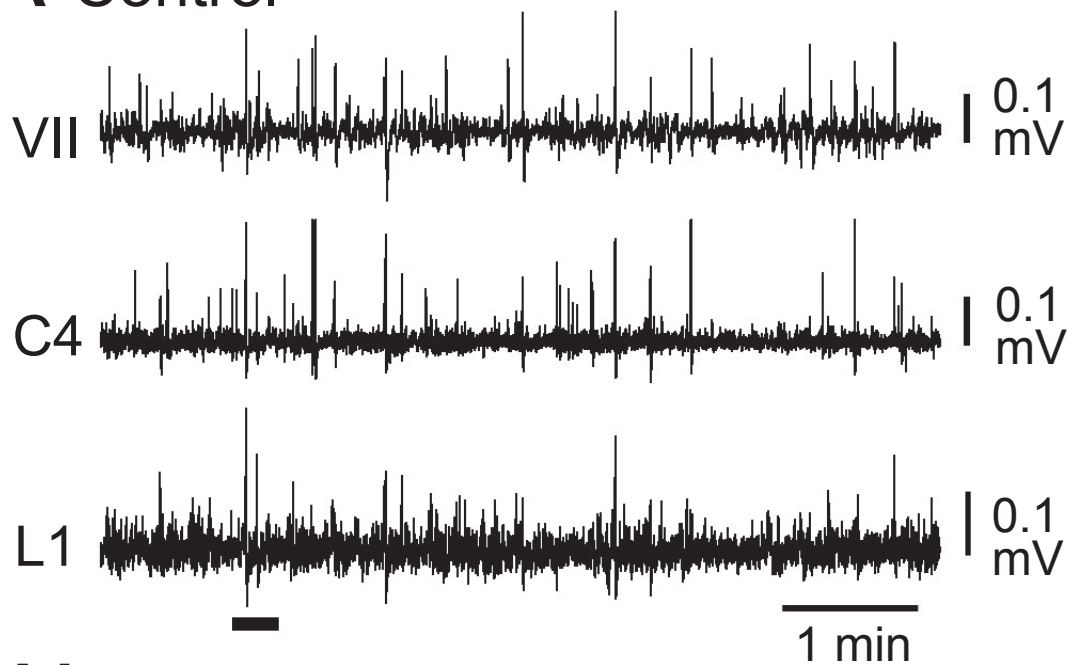

# A'

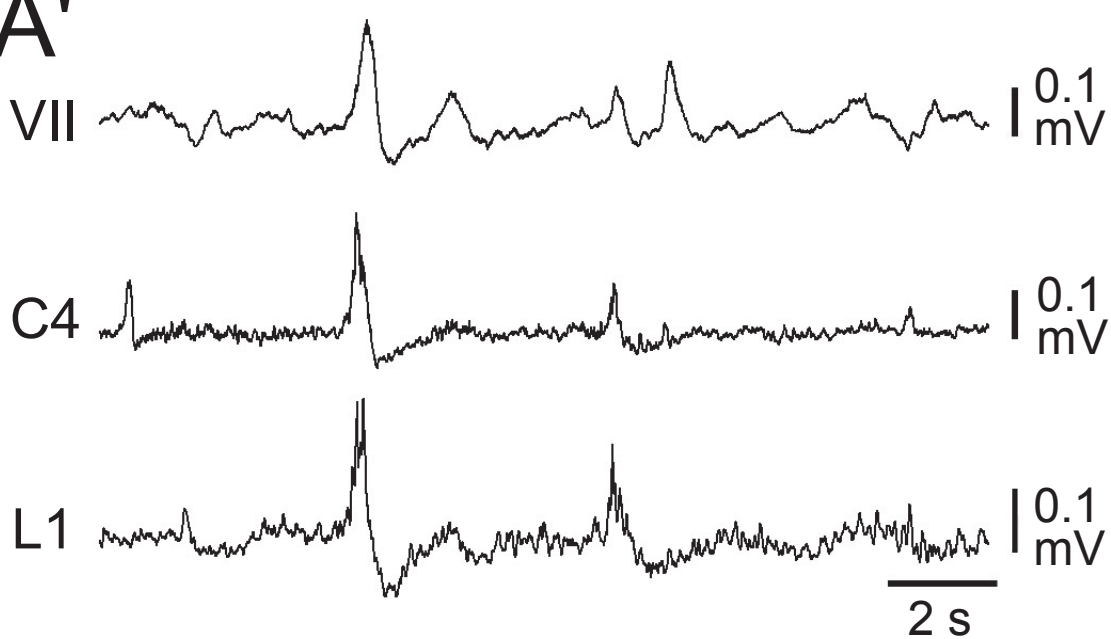

# B Average

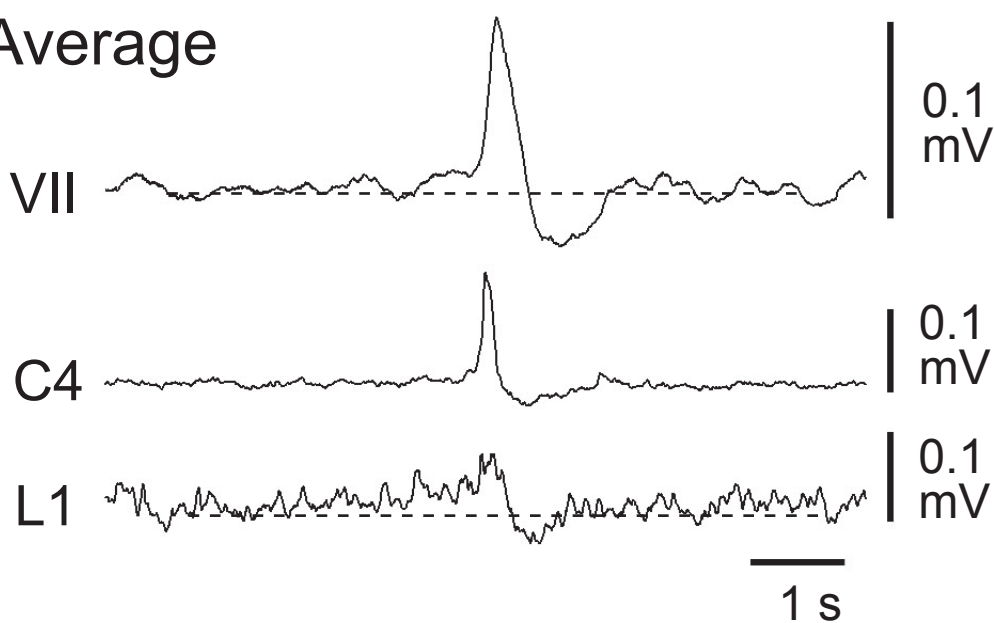

Supplement: tjp0585-0117_SD2.pdf [file tjp0585-0117_SD2.pdf]
